# Supplementary material for: Heterogeneous persistence of Mycobacterium leprae in oral and nasal mucosa of multibacillary patients during multidrug therapy
Source: PubMed Central journal article supplement (PMC9575966; doi:10.1590/0074-02760220058), 2022-10-17

TABLE

| Target gene/probes | Primers                                | Amplicon size | Reference |
|--------------------|----------------------------------------|---------------|-----------|
| Probe 16S          | 6FAM - CATCCTGCACCGCA – MGBNFQ         | -             |           |
| 16S rRNA           | Forward 5'-GCATGTCTTGTGGTGGAAAGC-3'    | 71 bp         | (8)       |
|                    | Reverse 5'-CACCCCACCAACAAGCTGAT-3'     |               |           |
| <i>folP1</i>       | Forward 5'-TACTTACTGTAATCCCCTGTGCTG-3' | 173 bp        |           |
|                    | Reverse 5'-TTGATCCTGACGATGCTGTC-3'     |               |           |
| <i>rpoB</i>        | Forward 5'-GGTGGTCGCCGCTATCAAG-3'      | 289 bp        | (28)      |
|                    | Reverse 5'-TTTGCGGTACGGTGTTCG-3'       |               |           |
| <i>gyrA</i>        | Forward 5'-CCCGGACCGTAGCCACGCTAAGTC-3' | 178 bp        |           |
|                    | Reverse 5'-CATCGCTGCCGGTGGGTCATTA-3'   |               |           |

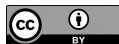

Supplement: 1678-8060-mioc-117-e220058-s.pdf [file 1678-8060-mioc-117-e220058-s.pdf]
